# Supplementary material
Source: ML conference proceedings conference paper supplement (https://www.ecva.net/papers/eccv_2020/papers_ECCV/html/123560035_ECCV_2020_paper.php)
Supplement: Supplementary file 3 [file 123560035-supp.zip]

Archive with 6 entries (5 files):
- 1279-supp/
- __MACOSX/._1279-supp
- 1279-supp/1279-supp.pdf
- __MACOSX/1279-supp/._1279-supp.pdf
- 1279-supp/BSL1K.mp4
- __MACOSX/1279-supp/._BSL1K.mp4
